# Supplementary material for: Giant offshore pumice deposit records a shallow submarine explosive eruption of ancestral Santorini
Source: Springer Nature journal article supplement (doi:10.1038/s43247-023-01171-z), 2024-01-15
Supplement: MOESM2 [file 43247_2023_1171_MOESM2_ESM.pdf]

# Giant offshore pumice deposit records a shallow submarine explosive eruption of ancestral Santorini

## *Supplementary Information*

Tim Druitt<sup>1</sup>, Steffen Kutterolf<sup>2</sup>, Thomas A. Ronge<sup>3</sup>, Christian Hübscher<sup>4</sup>, Paraskevi Nomikou<sup>5</sup>, Jonas Preine<sup>4</sup>, Ralf Gertisser<sup>6</sup>, Jens Karstens<sup>2</sup>, Jörg Keller<sup>7</sup>, Olga Koukousioura<sup>8</sup>, Michael Manga<sup>9</sup>, Abigail Metcalfe<sup>1</sup>, Molly McCanta<sup>10</sup>, Iona McIntosh<sup>11</sup>, Katharina Pank<sup>2</sup>, Adam Woodhouse<sup>12</sup>, Sarah Beethe<sup>13</sup>, Carole Berthod<sup>14</sup>, Shun Chiyonobu<sup>15</sup>, Hehe Chen<sup>16</sup>, Acacia Clark<sup>17</sup>, Susan DeBari<sup>18</sup>, Raymond Johnston<sup>19</sup>, Ally Peccia<sup>20</sup>, Yuzuru Yamamoto<sup>21</sup>, Alexis Bernard<sup>22</sup>, Tatiana Fernandez Perez<sup>23</sup>, Christopher Jones<sup>24</sup>, Kumar Batuk Joshi<sup>25</sup>, Günther Kletetschka<sup>26</sup>, Xiaohui Li<sup>27</sup>, Antony Morris<sup>28</sup>, Paraskevi Polymenakou<sup>29</sup>, Masako Tominaga<sup>30</sup>, Dimitrios Papanikolaou<sup>5</sup>, Kuo-Lung Wang<sup>31</sup>, Hao-Yang Lee<sup>31</sup>

<sup>1</sup>University Clermont-Auvergne, CNRS, IRD, OPGC, Laboratoire Magmas et Volcans, Clermont-Ferrand, France

<sup>2</sup>GEOMAR Helmholtz Centre for Ocean Research Kiel, Wischhofstrasse 1-3, D-24148 Kiel, Germany

<sup>3</sup>International Ocean Discovery Program, Texas A&M University, College Station TX 77845, USA

<sup>4</sup>Institute of Geophysics, University of Hamburg, Bundesstrasse 55, D-20146 Hamburg, Germany

<sup>5</sup>Department of Geology and Geoenvironment, National and Kapodistrian University of Athens, 15784 Athens, Greece

<sup>6</sup>School of Geography, Geology and the Environment, Keele University, Keele, Staffordshire ST5 5BG, UK

<sup>7</sup>Institut für Geo- und Umweltwissenschaften, Mineralogie - Petrologie, Albertstraße 23b, 79104 Freiburg, Germany

<sup>8</sup>School of Geology, Aristotle University of Thessaloniki, 54124 Thessaloniki, Greece

<sup>9</sup>Department of Earth and Planetary Science, University of California, Berkeley, CA 94720, USA

<sup>10</sup>Department of Earth and Planetary Sciences, University of Tennessee, Knoxville TN 37996-1526, USA

<sup>11</sup>Japan Agency for Marine-Earth Science and Technology, 2-15 Natsushima-cho, Yokosuka Kanagawa 237-0061, Japan

<sup>12</sup>Institute for Geophysics, University of Texas, J.J. Pickle Research Campus, Bldg. 196, Austin TX 78758, USA

<sup>13</sup>College of Earth, Ocean, and Atmospheric Sciences, Oregon State University, Corvallis OR 97333, USA

<sup>14</sup>Institut De Physique Du Globe De Paris, Centre National de la Recherche Scientifique (CNRS), 75005 Paris, France

<sup>15</sup>Faculty of International Resource Sciences, Akita University, Akita, Akita Prefecture 0108502, Japan

<sup>16</sup>School of Ocean Sciences, China University of Geosciences, 100083 Haidan District, Beijing, China

<sup>17</sup>School of Natural Sciences/CODES, University of Tasmania, Hobart 7005, Australia

<sup>18</sup>Geology Department, Western Washington University, Bellingham WA 98225, USA

<sup>19</sup>School of Geosciences, University of South Florida, Tampa FL 33620, USA

<sup>20</sup>Lamont-Doherty Earth Observatory, Columbia University, Palisades NY 10964, USA

<sup>21</sup>Graduate School of Science, Kobe University, 1-1 Rokkodai-cho, Nada-ku, Kobe, Hyogo 657-8501, Japan

<sup>22</sup>Laboratoire des Fluides Complexes et leurs Réservoirs, Université de Pau et des Pays de l'Adour, F-64000 Pau, France

<sup>23</sup>Department of Geology, Kent State University, 221 McGilvrey Hall, 325 S Lincoln Street, Kent OH 44242, USA

<sup>24</sup>Department of Earth and Planetary Sciences, University of California, Riverside CA 92506, USA

<sup>25</sup>Solid Earth Research Group, National Centre for Earth Science Studies, Thiruvananthapuram, Kerala 695011, India

<sup>26</sup>Geophysical Institute, University of Alaska Fairbanks, 2156 Koyukuk Drive, Fairbanks Alaska 99775, USA

<sup>27</sup>Key Laboratory of Submarine Geoscience and Prospecting Techniques, Ocean University of China, Qingdao, China

<sup>28</sup>School of Geography, Earth and Environmental Sciences, Plymouth University, Drake Circus, Plymouth PL4 8AA, UK

<sup>29</sup>Institute of Marine Biology, Biotechnology and Aquaculture, Hellenic Centre for Marine Research, Heraklion, Greece

<sup>30</sup>Department of Geology and Geophysics, Woods Hole Oceanographic Institution, Woods Hole MA 02543, USA

<sup>31</sup>Institute of Earth Sciences, Academia Sinica, Taipei, 11529, Taiwan

## Supplementary figures and tables

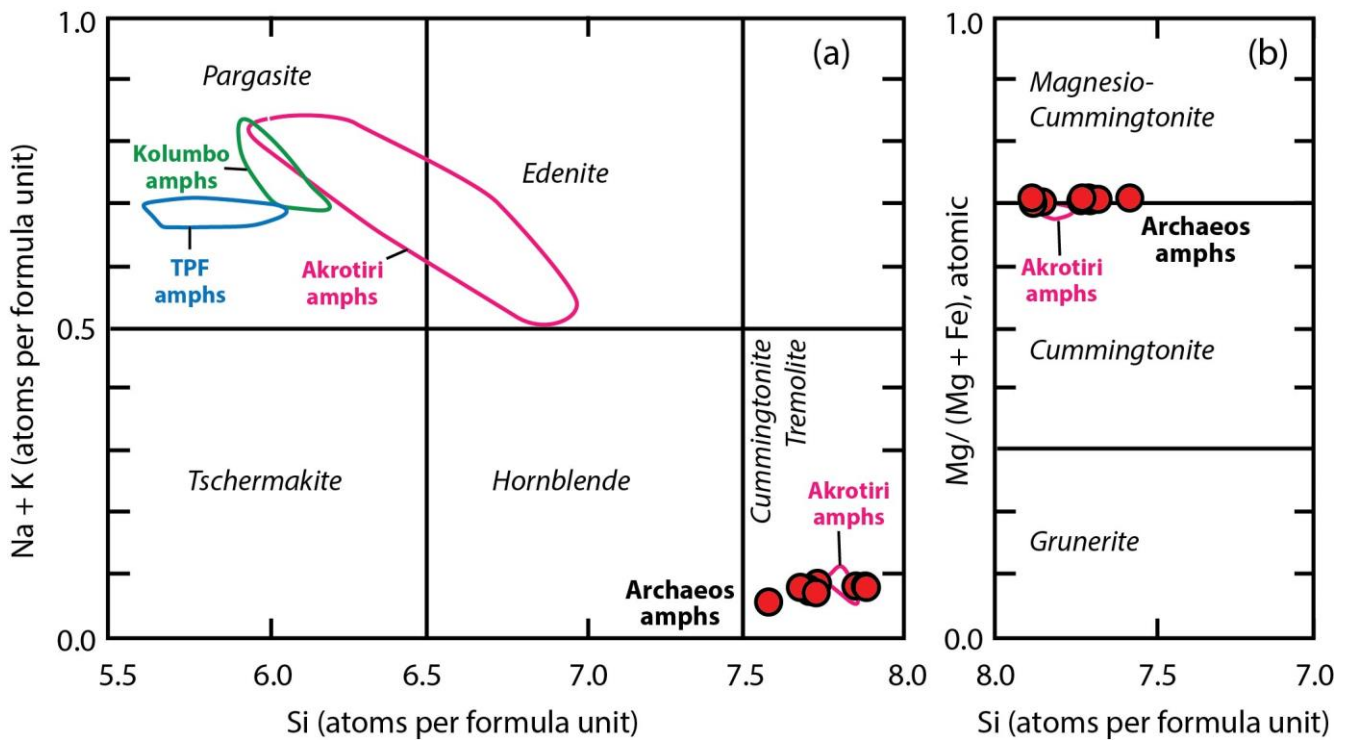

**Supplementary Figure 1. Amphiboles in the Archaeos Tuff.** (a) Compositions of amphiboles (amph) from the Archaeos Tuff, and distinction from those of the Early Centres of Akrotiri<sup>1,2</sup>, the Thera Pyroclastic Formation (TPF) of Santorini<sup>3</sup>, and the 1650 CE eruption of Kolumbo<sup>4</sup>. Cummingtonite similar compositionally to that of the Archaeos Tuff occurs in some tuffs of the Akrotiri centres. Note that the Akrotiri tuffs contain coexisting calcic amphiboles and cummingtonite. (b) Classification of the Archaeos amphiboles as cummingtonite to magnesio-cummingtonite, with comparison with those from the Akrotiri centres.

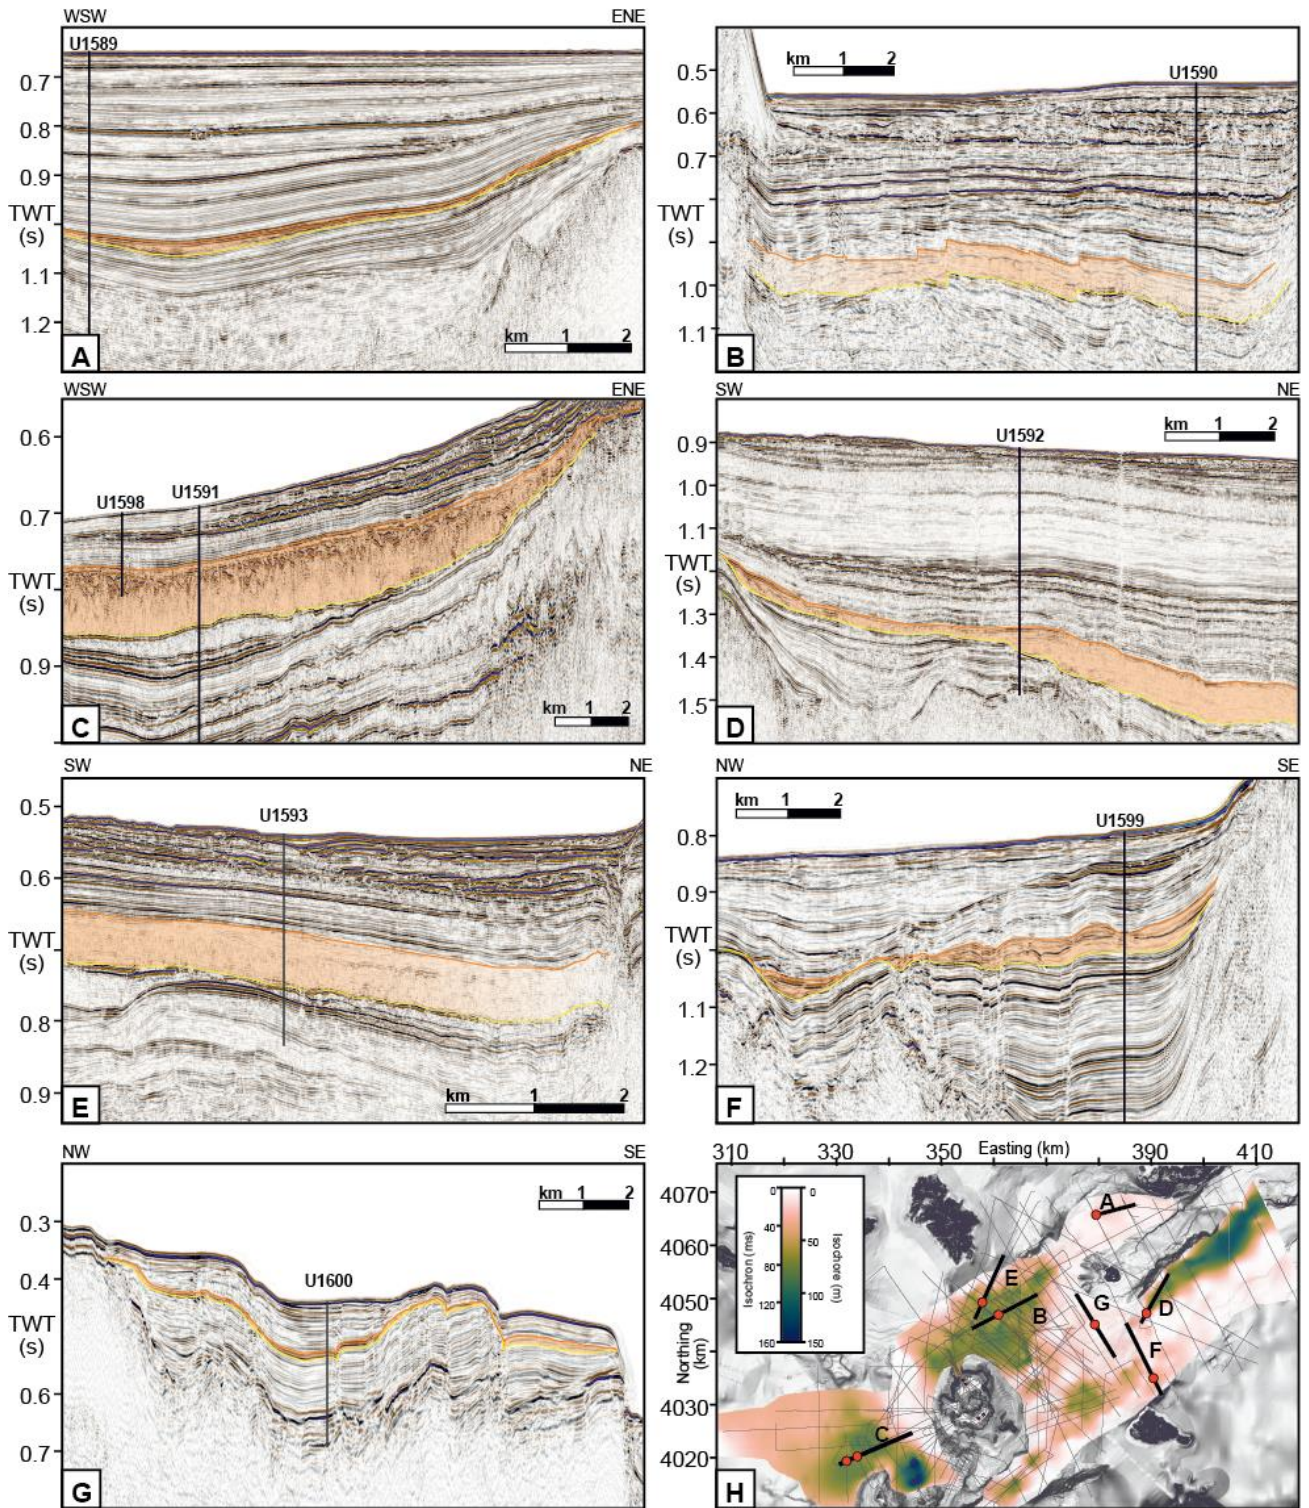

**Supplementary Figure 2. Compilation of seismic profiles showing the Archaeos Tuff in orange.** Based on published seismic profiles<sup>5</sup>. Note that the unit was not recovered at Site U1590, but its presence is inferred based on the seismic stratigraphy and biostratigraphic age-depth data.

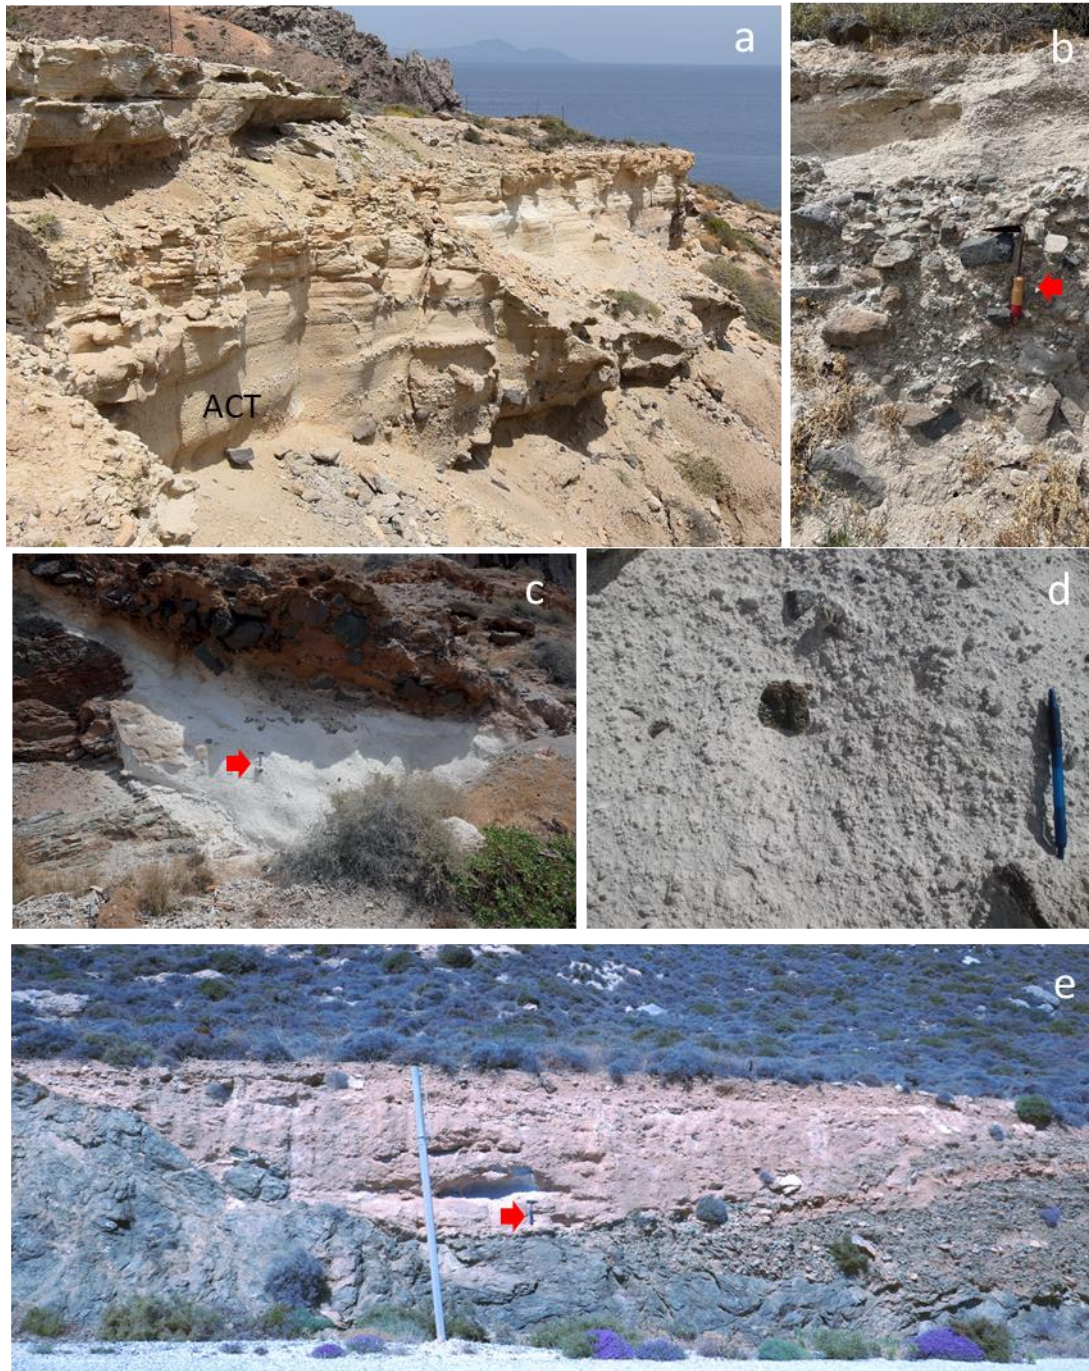

**Supplementary Figure 3. Onland outcrops of the Archaeos Tuff.** (a) Christiani Island ( $36^{\circ}14.74' \text{ N} / 25^{\circ}12.53' \text{ E}$ ). The Archaeos Tuff (marked ACT) is 4 m thick and is overlain by other minor pumice and ash layers. Santorini lies in the distance. (b) A lithic breccia lens within the Archaeos Tuff on Christiani Island, with scraper for scale (red arrow). (c) The Archaeos Tuff on Santorini. The outcrop occurs near sea level at the base of the caldera wall ( $36^{\circ}22.34' \text{ N} / 25^{\circ}25.38' \text{ E}$ ). The tuff directly overlies basement schists and is in turn overlain by a blocky regolith. The outcrop stratigraphically underlies the entire Thera Pyroclastic Formation of Santorini. Hammer for scale (red arrow). (d) Close-up of the outcrop in Figure c, showing the relatively fine grained and poorly sorted nature of the ignimbrite. (e) Outcrop of the Archaeos Tuff on Anafi Island, where it forms a thin lens directly atop basement schists ( $36^{\circ}21.39' \text{ N} / 25^{\circ}48.26' \text{ E}$ ). Hammer for scale (red arrow). The vertical grey line is a metal pole.

**Supplementary Table 1: Description of the submarine facies of the Archaeos Tuff**

|               |                                                                                                                                                                                                                                                                                                                                                                                                                                                                                                                                                                                                                                                                                       |
|---------------|---------------------------------------------------------------------------------------------------------------------------------------------------------------------------------------------------------------------------------------------------------------------------------------------------------------------------------------------------------------------------------------------------------------------------------------------------------------------------------------------------------------------------------------------------------------------------------------------------------------------------------------------------------------------------------------|
| Thickness     | In the cores: thickest (75 m) at Site U1593 and thinnest (6 m) at Site U1600. On seismic images: up to 150 m thick between Santorini and Christiana and in the Anafi Basin.                                                                                                                                                                                                                                                                                                                                                                                                                                                                                                           |
| Grain size    | At Sites U1591 and U1598, it is composed of well sorted, clast-supported lapilli tuff poor in fine ash, with pumice lapilli to several cm in diameter. At Site U1589, the deposit is mostly of ash grade.                                                                                                                                                                                                                                                                                                                                                                                                                                                                             |
| Texture       | Massive to diffusely bedded lapilli-tuff and tuff (terminology of <a href="#">ref 6</a> ), with a top that grades up into overlying muds and oozes. Bedding within the deposit reflects variations in grain size and component proportions. Normally graded intervals in some cores may be attributable to sorting within submarine gravity flows, or may be artifacts due to ash liquefaction during drilling and core recovery. Ash liquefaction and other disturbance effects during core recovery ( <a href="#">ref 7</a> ) overprinted finer-scale sedimentary structures and caused artificial grading within core sections, resulting in loss of sedimentological information. |
| Consolidation | Totally unconsolidated. The terms lapilli tuff and tuff are used even though the deposit is unconsolidated.                                                                                                                                                                                                                                                                                                                                                                                                                                                                                                                                                                           |
| Components    | Pumice lapilli, glass shards, lithic fragments and free crystals, with bioclasts picked up from the sea floor                                                                                                                                                                                                                                                                                                                                                                                                                                                                                                                                                                         |
| Pumice        | The pumice lapilli are highly vesicular and are mostly white, although a subordinate grey variety and white/grey banded varieties are also present. Vesicles in the pumices range from spherical to tubular or fibrous. The pumice lapilli range from angular to rounded.                                                                                                                                                                                                                                                                                                                                                                                                             |
| Lithics       | Lithic clasts are systematically smaller than pumice clasts, and occur scattered uniformly throughout the deposit or concentrated in clast-supported lithic-rich layers. Lithic components are mainly lavas, but greenschists, limestone and microgranitoids also occur.                                                                                                                                                                                                                                                                                                                                                                                                              |

**Supplementary Table 2. Grain size analyses of offshore and onshore facies of the Archaeos Tuff**

| Drill site                             | Core U1599A | Core U1599A | Core U1599A | Core U1591B | Core U1591B | Core U1599A | Core U1593A | Core U1593A | Core U1598A | Core U1593A | Core U1593B | Core U1593B |
|----------------------------------------|-------------|-------------|-------------|-------------|-------------|-------------|-------------|-------------|-------------|-------------|-------------|-------------|
| Core and section                       | 27F 2       | 29F 3       | 29F 2       | 10F 1       | 10F 1       | 28F 3       | 16H 2       | 18F 2       | 09F 2       | 17F 2       | 17F 2       | 27F 2       |
| Depth in section (cm)                  | 46-53       | 55-63       | 26-33       | 89-100      | 128-138     | 63-70       | 95-100      | 35-40       | 97-106      | 30-35       | 30-35       | 82-92       |
| 64 to 32 mm                            | -5 phi      |             |             |             |             |             |             |             |             |             |             |             |
| 32 to 16 mm                            | -4 phi      |             |             |             |             |             |             |             |             |             |             |             |
| 16 to 8 mm                             | -3 phi      | 6.96        | 6.29        | 10.34       | 11.78       | 7.15        | 5.38        | 10.08       | 2.48        | 13.12       | 5.47        | 0.08        |
| 8 to 4 mm                              | -2 phi      | 20.45       | 5.82        | 21.00       | 16.54       | 15.99       | 6.10        | 30.59       | 14.54       | 28.22       | 13.12       | 2.20        |
| 4 to 2 mm                              | -1 phi      | 27.00       | 11.68       | 24.97       | 18.07       | 30.24       | 10.48       | 29.22       | 22.21       | 26.98       | 21.31       | 7.98        |
| 2 to 1 mm                              | 0 phi       | 14.56       | 14.17       | 17.71       | 17.47       | 20.64       | 13.87       | 13.46       | 18.54       | 14.85       | 25.41       | 21.01       |
| 1 mm to 500 µm                         | 1 phi       | 7.57        | 15.56       | 14.26       | 16.30       | 13.70       | 15.49       | 8.09        | 16.84       | 9.53        | 21.84       | 23.53       |
| 500 to 250 µm                          | 2 phi       | 7.55        | 17.15       | 8.37        | 11.92       | 7.71        | 20.27       | 4.94        | 13.44       | 5.69        | 6.75        | 24.92       |
| 250 to 125 µm                          | 3 phi       | 7.11        | 13.82       | 2.34        | 5.35        | 2.50        | 17.91       | 2.48        | 7.31        | 1.24        | 3.36        | 19.54       |
| 125 to 63 µm                           | 4 phi       | 4.47        | 7.78        | 0.72        | 1.37        | 1.14        | 6.63        | 0.74        | 3.26        | 0.25        | 1.36        | 0.65        |
| <63 µm                                 | >4 phi      | 4.32        | 7.72        | 0.30        | 1.21        | 0.94        | 3.86        | 0.41        | 1.38        | 0.12        | 1.39        | 0.08        |
| Inman median (phi units) <sup>8</sup>  | -1.20       | 0.80        | -1.30       | -0.80       | -1.10       | 0.90        | -1.70       | -0.45       | -1.70       | -0.60       | -0.60       | 0.80        |
| Inman sorting (phi units) <sup>8</sup> | 2.28        | 2.30        | 1.70        | 2.03        | 1.55        | 2.08        | 1.45        | 1.88        | 1.50        | 1.50        | 1.50        | 1.44        |
| Wt % < 1 mm                            | 31.03       | 62.03       | 25.99       | 36.14       | 25.98       | 64.17       | 16.66       | 42.22       | 16.83       | 34.69       | 68.73       | 68.73       |
| Wt % < 63 µm                           | 4.32        | 7.72        | 0.30        | 1.21        | 0.94        | 3.86        | 0.41        | 1.38        | 0.12        | 1.39        | 0.08        | 0.08        |
| Wt % 16-8 mm lithics                   | 0           | 0           | 0           | 19          | 0           | 0           | 0           | 0           | 0           | 0           | 0           | 0           |
| Wt % 8-4 mm lithics                    | 0           | 0           | 0           | 15          | 2           | 0           | 0           | 0           | 0           | 0           | 0           | 0           |
| Wt % 4-2 mm lithics                    | 0           | 0           | 0           | 0           | 1           | 0           | 0           | 2           | 0           | 8           | 0           | 0           |

  

| Drill site                             | Core U1593B | Core U1591B | Core U1593A | Core U1600A | Core U1589B | Core U1598B | Core U1593A | Core U1589B | Core U1589B | Onland Santorini | Onland Anafi |       |
|----------------------------------------|-------------|-------------|-------------|-------------|-------------|-------------|-------------|-------------|-------------|------------------|--------------|-------|
| Core and section                       | 10F 2       | 17F 1       | 14H 2       | 06F 1       | 60F 1       | 03F 1       | 20F 2       | 59F 1       | 60F 1       |                  |              |       |
| Depth in section (cm)                  | 55-65       | 90-100      | 50-55       | 20-30       | 15-25       | 91-101      | 55-65       | 70-80       | 5-10        |                  |              |       |
| 64 to 32 mm                            | -5 phi      |             |             |             |             |             |             |             |             | 2.61             | 4.24         |       |
| 32 to 16 mm                            | -4 phi      |             |             |             |             |             |             |             |             | 9.33             | 6.50         |       |
| 16 to 8 mm                             | -3 phi      | 9.45        | 0.12        | 0.04        | 0.10        | 5.84        | 0.13        | 0.10        | 0.02        | 0.04             | 13.81        | 12.71 |
| 8 to 4 mm                              | -2 phi      | 36.44       | 20.98       | 6.54        | 0.10        | 19.25       | 4.50        | 18.03       | 7.33        | 0.04             | 14.93        | 14.41 |
| 4 to 2 mm                              | -1 phi      | 23.62       | 13.35       | 6.18        | 4.33        | 16.71       | 15.63       | 18.95       | 10.57       | 2.40             | 8.17         | 7.06  |
| 2 to 1 mm                              | 0 phi       | 12.01       | 12.16       | 4.49        | 9.38        | 9.57        | 17.62       | 16.11       | 6.93        | 5.61             | 6.87         | 7.03  |
| 1 mm to 500 µm                         | 1 phi       | 10.26       | 7.87        | 2.87        | 23.51       | 8.67        | 24.24       | 15.60       | 4.30        | 9.02             | 5.67         | 7.77  |
| 500 to 250 µm                          | 2 phi       | 5.80        | 18.00       | 3.34        | 23.20       | 8.08        | 22.78       | 15.81       | 5.34        | 21.16            | 5.63         | 8.99  |
| 250 to 125 µm                          | 3 phi       | 2.43        | 26.34       | 17.06       | 34.43       | 15.37       | 13.11       | 10.23       | 17.94       | 27.91            | 7.21         | 10.88 |
| 125 to 63 µm                           | 4 phi       | 0.00        | 1.19        | 43.00       | 3.51        | 11.84       | 1.85        | 3.34        | 27.20       | 13.70            | 8.30         | 2.03  |
| <63 µm                                 | >4 phi      | 0.00        | 0.00        | 16.49       | 1.44        | 4.67        | 0.13        | 1.82        | 20.39       | 20.11            | 17.47        | 18.37 |
| Inman median (phi units) <sup>8</sup>  | -1.86       | 0.48        | 3.26        | 1.46        | -0.17       | 0.50        | -0.20       | 2.90        | 2.30        | -0.85            | -0.30        |       |
| Inman sorting (phi units) <sup>8</sup> | 1.53        | 2.34        | 2.15        | 1.38        | 2.77        | 1.60        | 2.05        | 2.65        | 1.85        | 3.89             | 4.17         |       |
| Wt % < 1 mm                            | 18.49       | 53.40       | 82.76       | 86.08       | 48.63       | 62.12       | 46.81       | 75.15       | 91.91       | 44.28            | 48.05        |       |
| Wt % < 63 µm                           | 0.00        | 0.00        | 16.49       | 1.44        | 4.67        | 0.13        | 1.82        | 20.39       | 20.11       | 17.47            | 18.37        |       |
| Wt % 16-8 mm lithics                   | 0           | 0           | 0           | 0           | 0           | 0           | 0           | 0           | 0           | 0                | 0            |       |
| Wt % 8-4 mm lithics                    | 0           | 0           | 0           | 0           | 0           | 0           | 0           | 0           | 0           | 0                | 0            |       |
| Wt % 4-2 mm lithics                    | 9           | 0           | 0           | 0           | 0           | 0           | 0           | 0           | 0           | 0                | 0            |       |

**Supplementary Table 3. Pumice vesicularities**

| <b>Sample</b>                | <b>% Total</b> | <b>% Connected</b> | <b>% Isolated</b> |
|------------------------------|----------------|--------------------|-------------------|
| 398 U1599A 28F 1 W 100/140 a | 75.3           | 65.6               | 9.7               |
| 398 U1599A 28F 1 W 100/140 b | 75.3           | 64.3               | 11.0              |
| 398 U1599A 28F 1 W 100/140 c | 67.9           | 49.5               | 18.4              |
| 398 U1599A 27F CC 10/15 a    | 80.1           | 72.0               | 8.1               |
| 398 U1599A 27F CC 10/15 b    | 80.5           | 71.1               | 9.3               |
| 398 U1599A 27F CC 10/15 c    | 83.5           | 74.9               | 8.7               |
| 398 U1599A 29F 3 W 20/75 a   | 68.5           | 55.5               | 13.0              |
| 398 U1599A 29F 3 W 20/75 b   | 73.2           | 63.4               | 9.9               |
| 398 U1599A 29F 3 W 20/75 c   | 77.6           | 68.4               | 9.3               |
| 398 U1591B 10F 2 W 97/104 a  | 72.4           | 57.9               | 14.5              |
| 398 U1591B 10F 2 W 97/104 b  | 78.7           | 62.7               | 16.0              |
| 398 U1591B 10F 2 W 97/104 c  | 75.9           | 64.7               | 11.2              |
| 398 U1599A 25F CC 14/18 a    | 73.7           | 60.4               | 13.2              |
| 398 U1599A 25F CC 14/18 b    | 77.1           | 63.1               | 14.1              |
| 398 U1599A 25F CC 14/18 c    | 78.4           | 64.5               | 13.9              |
| 398 U1599A 26F 1 W 50/90 a   | 81.7           | 75.0               | 6.7               |
| 398 U1599A 26F 1 W 50/90 b   | 69.8           | 48.2               | 21.6              |
| 398 U1599A 26F 1 W 50/90 c   | 75.9           | 61.0               | 14.9              |
| <b>Mean</b>                  | <b>75.9</b>    | <b>63.5</b>        | <b>12.4</b>       |
| <b>1 Standard deviation</b>  | <b>4.4</b>     | <b>7.5</b>         | <b>3.8</b>        |

**Supplementary Table 4. Representative glass analyses**

|                                    | Christiani   | Santorini    | Anafi        | U1589        | U1591        | U1592        | U1593        | U1598        | U1599        | U1600        |
|------------------------------------|--------------|--------------|--------------|--------------|--------------|--------------|--------------|--------------|--------------|--------------|
| Levels                             | 3            | 3            | 1            | 3            | 4            | 2            | 4            | 8            | 15           | 2            |
| Analyses                           | 21           | 20           | 13           | 43           | 62           | 28           | 54           | 122          | 223          | 23           |
|                                    | Mean         |
|                                    | (±1SD)       |
| <b>Na<sub>2</sub>O</b>             | 4.1 (0.2)*   | 3.0 (0.3)    | 4.2 (0.3)    | 4.1 (0.2)    | 4.1 (0.2)    | 4.2 (0.2)    | 4.1 (0.2)    | 4.1 (0.2)    | 4.1 (0.2)    | 4.1 (0.4)    |
| <b>K<sub>2</sub>O</b>              | 3.4 (0.2)    | 4.9 (0.2)    | 3.5 (0.3)    | 3.5 (0.2)    | 3.5 (0.2)    | 3.4 (0.2)    | 3.3 (0.1)    | 3.4 (0.2)    | 3.4 (0.2)    | 3.6 (0.5)    |
| <b>FeO</b>                         | 0.7 (0.1)    | 0.7 (0.1)    | 0.7 (0.1)    | 0.7 (0.1)    | 0.7 (0.1)    | 0.7 (0.1)    | 0.8 (0.1)    | 0.7 (0.09)   | 0.8 (0.1)    | 0.7 (0.08)   |
| <b>SiO<sub>2</sub></b>             | 78.3 (0.3)   | 78.0 (0.2)   | 77.8 (0.3)   | 78.1 (0.2)   | 78.0 (0.3)   | 78.0 (0.3)   | 78.1 (0.3)   | 78.1 (0.2)   | 77.9 (0.3)   | 78.0 (0.3)   |
| <b>TiO<sub>2</sub></b>             | 0.1 (0.02)   | 0.1 (0.02)   | 0.1 (0.03)   | 0.1 (0.03)   | 0.1 (0.02)   | 0.1 (0.03)   | 0.1 (0.03)   | 0.1 (0.03)   | 0.1 (0.02)   | 0.1 (0.02)   |
| <b>MgO</b>                         | 0.1 (0.03)   | 0.1 (0.03)   | 0.1 (0.02)   | 0.1 (0.02)   | 0.1 (0.03)   | 0.1 (0.03)   | 0.1 (0.03)   | 0.1 (0.03)   | 0.1 (0.03)   | 0.1 (0.03)   |
| <b>CaO</b>                         | 0.7 (0.03)   | 0.7 (0.02)   | 0.7 (0.07)   | 0.7 (0.04)   | 0.7 (0.02)   | 0.7 (0.06)   | 0.7 (0.06)   | 0.7 (0.02)   | 0.7 (0.07)   | 0.7 (0.03)   |
| <b>MnO</b>                         | 0.1 (0.03)   | 0.1 (0.04)   | 0.1 (0.04)   | 0.1 (0.04)   | 0.1 (0.04)   | 0.1 (0.04)   | 0.1 (0.04)   | 0.1 (0.05)   | 0.1 (0.04)   | 0.1 (0.04)   |
| <b>Al<sub>2</sub>O<sub>3</sub></b> | 12.4 (0.2)   | 12.4 (0.1)   | 12.8 (0.1)   | 12.6 (0.1)   | 12.6 (0.1)   | 12.6 (0.2)   | 12.6 (0.1)   | 12.6 (0.1)   | 12.7 (0.2)   | 12.6 (0.1)   |
| <b>P<sub>2</sub>O<sub>5</sub></b>  | 0.04 (0.02)  | 0.02 (0.03)  | 0.02 (0.02)  | 0.02 (0.02)  | 0.02 (0.02)  | 0.03 (0.02)  | 0.02 (0.02)  | 0.02 (0.02)  | 0.02 (0.02)  | 0.02 (0.03)  |
| <b>Analyses</b>                    | 21           | 20           | 7            | 14           | 20           | 11           | 26           | 43           | 81           | 12           |
| <b>Rb</b>                          | 108.2 (11.0) | 118.5 (22.8) | 92.4 (3.5)   | 94.7 (6.6)   | 92.1 (2.0)   | 94.2 (6.5)   | 92.4 (5.1)   | 94.9 (2.6)   | 92.4 (4.5)   | 98.5 (5.1)   |
| <b>Sr</b>                          | 40.7 (3.3)   | 38.4 (3.5)   | 38.3 (0.9)   | 40.3 (2.7)   | 37.8 (1.0)   | 43.1 (5.2)   | 38.1 (1.8)   | 39.4 (1.4)   | 41.4 (3.9)   | 40.7 (2.9)   |
| <b>Y</b>                           | 17.7 (1.3)   | 16.4 (0.9)   | 16.5 (0.5)   | 16.7 (1.2)   | 16.5 (0.4)   | 17.0 (0.7)   | 16.3 (1.0)   | 16.8 (0.6)   | 16.6 (0.8)   | 17.5 (0.9)   |
| <b>Zr</b>                          | 65.0 (5.2)   | 61.2 (3.7)   | 60.9 (1.7)   | 62.2 (4.1)   | 60.5 (1.5)   | 64.7 (4.4)   | 59.9 (3.5)   | 62.1 (2.2)   | 62.7 (3.8)   | 64.5 (3.1)   |
| <b>Nb</b>                          | 9.8 (0.7)    | 9.8 (0.8)    | 8.7 (0.2)    | 8.9 (0.6)    | 8.8 (0.2)    | 9.0 (0.5)    | 8.7 (0.5)    | 9.0 (0.3)    | 8.8 (0.4)    | 9.4 (0.4)    |
| <b>Cs</b>                          | 1.4 (0.1)    | 1.4 (0.1)    | 1.2 (0.03)   | 1.2 (0.09)   | 1.2 (0.03)   | 1.3 (0.07)   | 1.2 (0.07)   | 1.2 (0.04)   | 1.2 (0.08)   | 1.3 (0.06)   |
| <b>Ba</b>                          | 809.1 (67.1) | 732.6 (47.0) | 743.5 (33.3) | 767.7 (54.6) | 746.1 (19.1) | 775.9 (36.5) | 744.2 (44.4) | 765.9 (25.5) | 754.8 (37.8) | 799.7 (36.6) |
| <b>La</b>                          | 24.1 (2.3)   | 20.5 (1.2)   | 22.1 (0.8)   | 22.6 (1.6)   | 22.0 (0.6)   | 23.7 (1.5)   | 21.9 (1.3)   | 22.5 (0.8)   | 22.7 (1.4)   | 23.5 (1.1)   |
| <b>Ce</b>                          | 43.3 (3.4)   | 39.0 (2.5)   | 38.9 (1.6)   | 40.8 (3.0)   | 39.2 (1.1)   | 41.7 (2.5)   | 39.0 (2.5)   | 40.4 (1.4)   | 40.3 (2.3)   | 41.8 (1.9)   |
| <b>Pr</b>                          | 4.1 (0.5)    | 3.6 (0.2)    | 3.8 (0.1)    | 3.9 (0.3)    | 3.8 (0.1)    | 4.0 (0.2)    | 3.7 (0.2)    | 3.9 (0.1)    | 3.9 (0.2)    | 4.0 (0.2)    |
| <b>Nd</b>                          | 13.0 (1.2)   | 12.0 (0.6)   | 12.3 (0.6)   | 13.0 (1.0)   | 12.5 (0.3)   | 13.1 (0.7)   | 12.4 (0.7)   | 12.8 (0.5)   | 12.7 (0.8)   | 13.5 (0.7)   |
| <b>Sm</b>                          | 2.4 (0.3)    | 2.2 (0.2)    | 2.3 (0.1)    | 2.4 (0.2)    | 2.3 (0.07)   | 2.4 (0.2)    | 2.3 (0.2)    | 2.3 (0.09)   | 2.3 (0.1)    | 2.4 (0.1)    |
| <b>Eu</b>                          | 0.4 (0.1)    | 0.4 (0.06)   | 0.4 (0.01)   | 0.4 (0.04)   | 0.4 (0.02)   | 0.4 (0.04)   | 0.4 (0.03)   | 0.4 (0.03)   | 0.4 (0.03)   | 0.4 (0.02)   |
| <b>Gd</b>                          | 2.2 (0.3)    | 2.1 (0.3)    | 2.1 (0.1)    | 2.1 (0.2)    | 2.1 (0.1)    | 2.2 (0.1)    | 2.0 (0.1)    | 2.1 (0.1)    | 2.1 (0.1)    | 2.2 (0.1)    |
| <b>Tb</b>                          | 0.4 (0.06)   | 0.3 (0.04)   | 0.4 (0.02)   | 0.4 (0.03)   | 0.3 (0.02)   | 0.4 (0.03)   | 0.3 (0.02)   | 0.4 (0.02)   | 0.4 (0.02)   | 0.4 (0.02)   |
| <b>Dy</b>                          | 2.6 (0.3)    | 2.3 (0.3)    | 2.5 (0.2)    | 2.5 (0.2)    | 2.5 (0.09)   | 2.5 (0.1)    | 2.4 (0.2)    | 2.5 (0.1)    | 2.4 (0.1)    | 2.6 (0.2)    |
| <b>Ho</b>                          | 0.6 (0.07)   | 0.5 (0.05)   | 0.6 (0.02)   | 0.6 (0.05)   | 0.5 (0.02)   | 0.6 (0.03)   | 0.5 (0.04)   | 0.6 (0.02)   | 0.5 (0.04)   | 0.6 (0.03)   |
| <b>Er</b>                          | 1.9 (0.2)    | 1.6 (0.1)    | 1.7 (0.1)    | 1.8 (0.1)    | 1.7 (0.06)   | 1.8 (0.1)    | 1.7 (0.1)    | 1.8 (0.07)   | 1.8 (0.09)   | 1.9 (0.07)   |
| <b>Tm</b>                          | 0.3 (0.05)   | 0.3 (0.03)   | 0.3 (0.02)   | 0.3 (0.02)   | 0.3 (0.01)   | 0.3 (0.02)   | 0.3 (0.03)   | 0.3 (0.02)   | 0.3 (0.02)   | 0.3 (0.02)   |
| <b>Yb</b>                          | 2.4 (0.3)    | 2.1 (0.2)    | 2.3 (0.2)    | 2.3 (0.2)    | 2.2 (0.09)   | 2.3 (0.1)    | 2.2 (0.2)    | 2.3 (0.1)    | 2.2 (0.2)    | 2.4 (0.1)    |
| <b>Lu</b>                          | 0.4 (0.04)   | 0.3 (0.03)   | 0.3 (0.03)   | 0.4 (0.04)   | 0.4 (0.02)   | 0.4 (0.02)   | 0.4 (0.03)   | 0.4 (0.02)   | 0.4 (0.02)   | 0.4 (0.02)   |
| <b>Hf</b>                          | 2.4 (0.3)    | 2.1 (0.2)    | 2.2 (0.1)    | 2.2 (0.2)    | 2.1 (0.09)   | 2.2 (0.1)    | 2.1 (0.1)    | 2.2 (0.08)   | 2.2 (0.1)    | 2.3 (0.2)    |
| <b>Ta</b>                          | 1.0 (0.2)    | 0.9 (0.1)    | 0.8 (0.03)   | 0.9 (0.07)   | 0.9 (0.03)   | 0.9 (0.06)   | 0.9 (0.06)   | 0.9 (0.03)   | 0.8 (0.05)   | 0.9 (0.05)   |
| <b>Pb</b>                          | 10.0 (1.5)   | 9.6 (1.6)    | 9.4 (3.4)    | 8.3 (0.7)    | 8.2 (0.2)    | 8.8 (0.5)    | 8.2 (0.5)    | 8.4 (0.4)    | 8.4 (0.5)    | 8.6 (0.3)    |
| <b>Th</b>                          | 17.9 (1.5)   | 16.7 (0.9)   | 16.6 (0.8)   | 17.0 (1.4)   | 16.6 (0.5)   | 17.1 (0.9)   | 16.5 (1.0)   | 16.8 (0.6)   | 16.6 (0.9)   | 17.7 (0.9)   |
| <b>U</b>                           | 6.3 (0.6)    | 6.4 (0.5)    | 5.5 (0.3)    | 5.9 (0.5)    | 5.7 (0.2)    | 5.8 (0.4)    | 5.7 (0.4)    | 5.8 (0.3)    | 5.7 (0.4)    | 6.1 (0.3)    |
| <b>Zr/Nb</b>                       | 6.6          | 6.3          | 7.0          | 7.0          | 6.9          | 7.2          | 6.9          | 6.9          | 7.2          | 6.9          |
| <b>Th/Yb</b>                       | 7.5          | 8.1          | 7.2          | 7.4          | 7.5          | 7.5          | 7.4          | 7.4          | 7.4          | 7.5          |
| <b>Ba/Ce</b>                       | 18.7         | 18.8         | 19.1         | 18.8         | 19.0         | 18.7         | 19.1         | 18.9         | 18.8         | 19.1         |
| <b>Zr/Rb</b>                       | 0.6          | 0.5          | 0.7          | 0.7          | 0.7          | 0.7          | 0.6          | 0.7          | 0.7          | 0.7          |
| <b>Ba/Y</b>                        | 45.7         | 44.5         | 45.0         | 45.9         | 45.2         | 45.6         | 45.7         | 45.5         | 45.5         | 45.7         |
| <b>Ba/Rb</b>                       | 7.5          | 6.4          | 8.0          | 8.1          | 8.1          | 8.3          | 8.1          | 8.1          | 8.2          | 8.1          |
| <b>Ce/Gd</b>                       | 20.3         | 18.7         | 18.5         | 20.0         | 19.0         | 19.4         | 19.2         | 19.7         | 19.5         | 18.7         |
| <b>Th/La</b>                       | 0.7          | 0.8          | 0.8          | 0.8          | 0.8          | 0.7          | 0.8          | 0.7          | 0.7          | 0.8          |
| <b>La/Sm</b>                       | 10.1         | 9.3          | 9.5          | 9.6          | 9.5          | 9.8          | 9.6          | 9.6          | 9.7          | 9.8          |
| <b>La/Yb</b>                       | 10.1         | 10.0         | 9.6          | 9.8          | 10.0         | 10.4         | 9.8          | 10.0         | 10.1         | 9.9          |
| <b>U/Th</b>                        | 0.4          | 0.4          | 0.3          | 0.3          | 0.3          | 0.3          | 0.3          | 0.3          | 0.3          | 0.3          |
| <b>Rb/Sr</b>                       | 2.7          | 3.1          | 2.4          | 2.4          | 2.4          | 2.2          | 2.4          | 2.4          | 2.3          | 2.4          |
| <b>Ba/Zr</b>                       | 12.4         | 19.1         | 12.2         | 12.4         | 12.3         | 12.0         | 12.4         | 12.3         | 12.1         | 12.4         |

\* Oxides are renormalised to 100% dry. 1 standard deviation (SD) in brackets

## Supplementary Table 5. Representative amphibole analyses

| Sample                         | Christiani<br>CHR 318 | Santorini<br>SAN-G | Anafi<br>AN 630 | U1589B       | U1592B       | U1593B       | U1598B       | U1599A       | U1600A       |
|--------------------------------|-----------------------|--------------------|-----------------|--------------|--------------|--------------|--------------|--------------|--------------|
| Analyses                       | 7                     | 14                 | 6               | 23           | 16           | 34           | 21           | 9            | 10           |
| SiO <sub>2</sub>               | 54.64 (0.51)*         | 55.73 (0.36)       | 55.35           | 54.46 (0.43) | 54.58 (0.22) | 54.68 (0.36) | 54.75 (0.27) | 54.51 (0.43) | 54.92 (0.16) |
| TiO <sub>2</sub>               | 0.24 (0.04)           | 0.19 (0.03)        | 0.19            | 0.24 (0.07)  | 0.20 (0.04)  | 0.20 (0.04)  | 0.20 (0.03)  | 0.21 (0.05)  | 0.19 (0.03)  |
| Al <sub>2</sub> O <sub>3</sub> | 1.26 (0.14)           | 1.28 (0.17)        | 1.21            | 1.41 (0.34)  | 1.27 (0.20)  | 1.28 (0.21)  | 1.21 (0.13)  | 1.39 (0.30)  | 1.17 (0.15)  |
| FeO                            | 16.01 (0.88)          | 16.17 (0.14)       | 15.64           | 16.50 (0.22) | 16.45 (0.09) | 16.48 (0.19) | 16.39 (0.14) | 16.37 (0.09) | 16.33 (0.11) |
| MnO                            | 2.25 (0.06)           | 2.28 (0.05)        | 2.29            | 2.31 (0.14)  | 2.39 (0.04)  | 2.34 (0.07)  | 2.35 (0.04)  | 2.37 (0.05)  | 2.34 (0.04)  |
| MgO                            | 20.82 (0.35)          | 20.93 (0.31)       | 21.11           | 21.61 (0.34) | 22.01 (0.18) | 21.80 (0.23) | 21.94 (0.18) | 21.86 (0.33) | 21.89 (0.18) |
| CaO                            | 1.36 (0.10)           | 1.41 (0.13)        | 1.35            | 1.68 (0.38)  | 1.31 (0.12)  | 1.45 (0.24)  | 1.40 (0.15)  | 1.45 (0.22)  | 1.48 (0.11)  |
| Na <sub>2</sub> O              | 0.28 (0.04)           | 0.29 (0.03)        | 0.28            | 0.30 (0.07)  | 0.27 (0.04)  | 0.27 (0.05)  | 0.26 (0.03)  | 0.28 (0.09)  | 0.25 (0.05)  |
| K <sub>2</sub> O               | 0.01 (0.01)           | 0.00 (0.00)        | 0.01            | 0.01 (0.01)  | 0.01 (0.01)  | 0.01 (0.01)  | 0.01 (0.01)  | 0.01 (0.01)  | 0.01 (0.01)  |
| <b>Total</b>                   | <b>96.88</b>          | <b>98.27</b>       | <b>97.42</b>    | <b>98.52</b> | <b>98.47</b> | <b>98.50</b> | <b>98.50</b> | <b>98.44</b> | <b>98.57</b> |

### Amphibole formulae, recalculated

|            |                                                                                                                                                                                                                                                                                                                                             |
|------------|---------------------------------------------------------------------------------------------------------------------------------------------------------------------------------------------------------------------------------------------------------------------------------------------------------------------------------------------|
| Christiani | (Na <sub>0.048</sub> K <sub>0.002</sub> )(Fe <sub>1.486</sub> Mn <sub>0.274</sub> Ca <sub>0.21</sub> Na <sub>0.03</sub> )(Mg <sub>4.463</sub> Fe <sup>ii</sup> <sub>0.439</sub> Al <sub>0.071</sub> )(Si <sub>7.858</sub> Al <sub>0.142</sub> )O <sub>22</sub> ((OH) <sub>2</sub> )                                                         |
| Santorini  | (Na <sub>0.023</sub> )(Fe <sub>1.456</sub> Mn <sub>0.273</sub> Ca <sub>0.214</sub> Na <sub>0.057</sub> )(Mg <sub>4.417</sub> Fe <sup>ii</sup> <sub>0.459</sub> Al <sub>0.104</sub> Ti <sub>0.02</sub> )(Si <sub>7.89</sub> Al <sub>0.11</sub> )O <sub>22</sub> ((OH) <sub>2</sub> )                                                         |
| Anafi      | (Na <sub>0.025</sub> K <sub>0.002</sub> )(Fe <sub>1.465</sub> Mn <sub>0.277</sub> Ca <sub>0.206</sub> Na <sub>0.052</sub> )(Mg <sub>4.486</sub> Fe <sup>ii</sup> <sub>0.4</sub> Al <sub>0.094</sub> Ti <sub>0.02</sub> )(Si <sub>7.891</sub> Al <sub>0.109</sub> )O <sub>22</sub> ((OH) <sub>2</sub> )                                      |
| U1589B     | (Na <sub>0.083</sub> Ca <sub>0.075</sub> K <sub>0.002</sub> )(Fe <sub>1.541</sub> Mn <sub>0.278</sub> Ca <sub>0.181</sub> )(Mg <sub>4.578</sub> Fe <sup>ii</sup> <sub>0.42</sub> Ti <sub>0.001</sub> )(Si <sub>7.739</sub> Al <sub>0.236</sub> Ti <sub>0.025</sub> )O <sub>22</sub> ((OH) <sub>2</sub> )                                    |
| U1592B     | (Na <sub>0.027</sub> K <sub>0.002</sub> )(Fe <sub>1.532</sub> Mn <sub>0.245</sub> Ca <sub>0.196</sub> Na <sub>0.027</sub> )(Mg <sub>4.536</sub> Fe <sup>iii</sup> <sub>0.396</sub> Fe <sup>ii</sup> <sub>0.068</sub> )(Si <sub>7.582</sub> Fe <sub>0.227</sub> Al <sub>0.171</sub> Ti <sub>0.02</sub> )O <sub>22</sub> ((OH) <sub>2</sub> ) |
| U1593B     | (Na <sub>0.037</sub> K <sub>0.002</sub> )(Fe <sub>1.465</sub> Mn <sub>0.279</sub> Ca <sub>0.219</sub> Na <sub>0.037</sub> )(Mg <sub>4.581</sub> Fe <sup>iii</sup> <sub>0.269</sub> Fe <sup>ii</sup> <sub>0.15</sub> )(Si <sub>7.707</sub> Al <sub>0.213</sub> Fe <sub>0.059</sub> Ti <sub>0.021</sub> )O <sub>22</sub> ((OH) <sub>2</sub> ) |
| U1598B     | (Na <sub>0.036</sub> K <sub>0.002</sub> )(Fe <sub>1.473</sub> Mn <sub>0.28</sub> Ca <sub>0.211</sub> Na <sub>0.035</sub> )(Mg <sub>4.607</sub> Fe <sup>iii</sup> <sub>0.264</sub> Fe <sup>ii</sup> <sub>0.128</sub> )(Si <sub>7.713</sub> Al <sub>0.201</sub> Fe <sub>0.065</sub> Ti <sub>0.021</sub> )O <sub>22</sub> ((OH) <sub>2</sub> ) |
| U1599A     | (Na <sub>0.038</sub> K <sub>0.002</sub> )(Fe <sub>1.46</sub> Mn <sub>0.283</sub> Ca <sub>0.219</sub> Na <sub>0.038</sub> )(Mg <sub>4.593</sub> Fe <sup>iii</sup> <sub>0.292</sub> Fe <sup>ii</sup> <sub>0.114</sub> )(Si <sub>7.683</sub> Al <sub>0.231</sub> Fe <sub>0.063</sub> Ti <sub>0.022</sub> )O <sub>22</sub> ((OH) <sub>2</sub> ) |
| U1600A     | (Na <sub>0.034</sub> K <sub>0.002</sub> )(Fe <sub>1.464</sub> Mn <sub>0.279</sub> Ca <sub>0.223</sub> Na <sub>0.034</sub> )(Mg <sub>4.594</sub> Fe <sup>iii</sup> <sub>0.246</sub> Fe <sup>ii</sup> <sub>0.16</sub> )(Si <sub>7.732</sub> Al <sub>0.194</sub> Fe <sub>0.054</sub> Ti <sub>0.02</sub> )O <sub>22</sub> ((OH) <sub>2</sub> )  |

\* Wt% oxide with 1 standard deviation in brackets

## Supplementary Table 6. Representative plagioclase analyses

| Sample                         | Santorini<br>SAN02-25 | Anafi<br>ANA18-2 | U1589B        | U1592B        | U1593B       | U1598B        | U1599A        | U1600A        |
|--------------------------------|-----------------------|------------------|---------------|---------------|--------------|---------------|---------------|---------------|
| Analyses                       | 13                    | 27               | 9             | 11            | 21           | 13            | 22            | 6             |
| SiO <sub>2</sub>               | 61.29 (0.39)*         | 61.43 (0.55)     | 61.95 (0.61)  | 61.83 (0.68)  | 61.49 (0.43) | 61.49 (0.36)  | 61.79 (0.46)  | 61.66 (0.54)  |
| Al <sub>2</sub> O <sub>3</sub> | 23.71 (0.27)          | 23.61 (0.38)     | 24.00 (0.33)  | 24.13 (0.44)  | 24.21 (0.17) | 24.24 (0.28)  | 24.10 (0.33)  | 24.29 (0.27)  |
| CaO                            | 5.52 (0.23)           | 5.50 (0.39)      | 5.51 (0.40)   | 5.67 (0.45)   | 5.72 (0.17)  | 5.72 (0.33)   | 5.57 (0.35)   | 5.80 (0.27)   |
| FeO                            | 0.19 (0.04)           | 0.21 (0.03)      | 0.17 (0.02)   | 0.17 (0.02)   | 0.17 (0.01)  | 0.18 (0.02)   | 0.16 (0.01)   | 0.17 (0.01)   |
| Na <sub>2</sub> O              | 8.19 (0.15)           | 8.29 (0.20)      | 8.17 (0.27)   | 8.17 (0.23)   | 7.92 (0.16)  | 8.08 (0.14)   | 8.14 (0.17)   | 7.99 (0.21)   |
| K <sub>2</sub> O               | 0.43 (0.03)           | 0.43 (0.05)      | 0.44 (0.03)   | 0.43 (0.03)   | 0.42 (0.02)  | 0.42 (0.04)   | 0.43 (0.04)   | 0.42 (0.03)   |
| <b>Total</b>                   | <b>99.33</b>          | <b>99.48</b>     | <b>100.24</b> | <b>100.40</b> | <b>99.94</b> | <b>100.13</b> | <b>100.19</b> | <b>100.32</b> |
| An**                           | 26.5                  | 26.2             | 26.5          | 27.0          | 27.9         | 27.4          | 26.8          | 27.9          |
| Ab**                           | 71.1                  | 71.4             | 71.0          | 70.5          | 69.7         | 70.2          | 70.8          | 69.7          |
| Or**                           | 2.5                   | 2.4              | 2.5           | 2.4           | 2.4          | 2.4           | 2.5           | 2.4           |

\* Wt% oxide with 1 standard deviation in brackets

\*\* Percentages of anorthite An (100Ca/[Ca+Na+K]), atomic, albite Ab (100Na/[Ca+Na+K]), and orthoclase Or (100K/[Ca+Na+K]) components.

## Supplementary Table 7. Paleobathymetry

| Site  | Before Archaeos<br>Tuff (m) | After Archaeos<br>Tuff (m) |
|-------|-----------------------------|----------------------------|
| U1589 | 200-700                     |                            |
| U1591 | 200-700                     |                            |
| U1592 | 500-1000                    |                            |
| U1593 | 200-700                     |                            |
| U1598 | No recovery                 | 200-700                    |
| U1599 | 200-700                     |                            |
| U1600 | 500-1000                    |                            |



**Supplementary Table 8: Description of the onland facies of the Archaeos Tuff**

| <b>Christiani</b>     |                                                                                                                                                                                                                                                                                                                                                                                                                         |
|-----------------------|-------------------------------------------------------------------------------------------------------------------------------------------------------------------------------------------------------------------------------------------------------------------------------------------------------------------------------------------------------------------------------------------------------------------------|
| <b>Outcrop</b>        | 36°14.74' N / 25°12.53' E. Crops out for 900 m long along the cliffs; maximum 4 m thick                                                                                                                                                                                                                                                                                                                                 |
| <b>Previous names</b> | Christiani Bims (ref 9) Unterer Bims von Christiani (ref 10), Christiani Ignimbrite (ref 11)                                                                                                                                                                                                                                                                                                                            |
| <b>Lithology</b>      | Massive to diffusely stratified, poorly sorted lapilli tuff. Nonwelded with the features typical of subaerial ignimbrite. Complex internal stratigraphy with several depositional units. Conspicuous lithic breccia lenses with lithic diameters up to 1 m at the base of the ignimbrite.                                                                                                                               |
| <b>Lithics</b>        | Perlitic obsidian, basaltic to andesitic lavas, biotite-granites, aplites, greenschists, limestones and marbles                                                                                                                                                                                                                                                                                                         |
| <b>Santorini</b>      |                                                                                                                                                                                                                                                                                                                                                                                                                         |
| <b>Outcrop</b>        | 36°22.34' N / 25°25.38' E at the base of the caldera wall near Cape Therma. Two nearby outcrops directly beneath the deposits from the Cape Therma 1 eruption and underlying M1 interplinian deposits                                                                                                                                                                                                                   |
| <b>Previous names</b> | Christiani Ignimbrite (ref 11)                                                                                                                                                                                                                                                                                                                                                                                          |
| <b>Lithology</b>      | Massive to diffusely stratified, poorly sorted lapilli tuff. Nonwelded with the features typical of subaerial ignimbrite. Maximum pumice diameters reach 9 cm, with the long axis of the 10 largest pumice clasts ranging from 3.5 to 9.0 cm, and with an average of 5.0 cm. Lithic clasts can be larger than pumices, with the long axis of the 15 largest lithics ranging from 4 to 15 cm, with an average of 8.6 cm. |
| <b>Lithics</b>        | Greenschists, marbles, granitoids, hyaloclastite and variably altered volcanic rocks.                                                                                                                                                                                                                                                                                                                                   |
| <b>Anafi</b>          |                                                                                                                                                                                                                                                                                                                                                                                                                         |
| <b>Outcrop</b>        | 36°21.39' N / 25°48.26'E at 135 m above sea level in the area of Megas Potamos. A single outcrop 10 m long.                                                                                                                                                                                                                                                                                                             |
| <b>Previous names</b> | Christiani Ignimbrite (ref 11)                                                                                                                                                                                                                                                                                                                                                                                          |
| <b>Lithology</b>      | Massive to diffusely stratified, poorly sorted lapilli tuff. Nonwelded with the features typical of subaerial ignimbrite. Lithic clasts are less abundant and on average smaller than in the equivalent deposits on Christiani and Santorini, ranging in size up to only 4 cm (long axis).                                                                                                                              |
| <b>Lithics</b>        | Lithic clasts are less diverse than on Santorini, with volcanic rocks identified as the principal lithic component.                                                                                                                                                                                                                                                                                                     |

**Supplementary References**

- Huijsmans, J.P.P. Calc-alkaline lavas from the volcanic complex of Santorini, Aegean Sea, Greece: a petrological, geochemical and stratigraphic study. *Geologica Ultraiectina* **41**, 316pp (1985).
- Gartzos, E., Dietrich, V.J. & Davis, E. Amphibole-plagioclase fractional crystallisation and magma mixing as major differentiation processes in the Akrotiri Volcanic Complex, Santorini, Greece. *Schweiz. Mineral. Petrogr. Mitt.* **79**, 231-262 (1999).
- Gertisser, R., Preece, K. & Keller, J. The Plinian Lower Pumice 2 eruption, Santorini, Greece: magma evolution and volatile behaviour. *J. Volcanol. Geotherm. Res.* **186**, 387-406 (2009).
- Cantner, K., Carey, S. & Nomikou, P. Integrated volcanologic and petrologic analysis of the 1650 AD eruption of Kolumbo submarine volcano, Greece. *J. Volcanol. Geotherm. Res.* **269**, 28-43 (2014).
- Preine, J., Karstens, J., Hübscher, C., Crutchley, G.J., Druitt, T.H., Schmid, F. & Nomikou, P. The Hidden Giant: How a rift pulse triggered a cascade of sector collapses and voluminous secondary mass-transport events in the early evolution of Santorini. *Basin Res.* **34**, 1465-1485 (2022).
- Fisher, R.V., & Schmincke, H.-U. *Pyroclastic Rocks*. Springer-Verlag, 472pp (1984).
- Jutzeler, M., White, J.D.L., Talling, P.J., McCanta, M., Morgan, S., Le Friant, A. & Ishizuka, O. Coring disturbances in IODP piston cores with implications for offshore record of volcanic events and the Missoula megafloods. *Geochem. Geophys. Geosys.* **15**, 3572-3590 (2014).
- Inman, D.L. Measures for describing the size distribution of sediments. *J. Sediment. Res.* **22**, 125-145 (1952).
- Puchelt, H., Murad, E. & Hubberten, H.W. Geochemical and petrological studies of lavas, pyroclastica and associated xenoliths from the Christiana Islands, Aegean Sea. *Neues Jahrbuch Für Mineralogie-Abhandlungen*, **131**, 140-155 (1977).
- Aarburg, S. & Frechen, M. Die pyroklastischen Abfolgen der Christiana-Inseln (Süd-Ägäis, Griechenland). In Becker-Haumann, R. & Frechen, M. (eds.) *Terrestrische Quartargeologie* 260-276 (1999).
- Keller, J., Dietrich, V., Reusser, E., Gertisser, R. & Aarburg, S. Recognition of a major ignimbrite in the early evolution of the Santorini Group: the Christiani Ignimbrite. *Cities on Volcanoes 6, Tenerife, Spain* pp. 4-5 (Abstract) (2010). <https://www.earth-prints.org/bitstream/2122/6924/1/Cities%20on%20Volcanoes%206%20Abstracts%20Volume.pdf>
